# Supplementary material
Source: publisher figshare collection journal article supplement (https://diabetesjournals.figshare.com/articles/dataset/_/13043093)
Supplement: Supplementary file 2 [file 2]

| Gene           | Primer Sequence (5' to 3') |
|----------------|----------------------------|
| mBECN1_F       | TTTCAGACTGGGTCGCTTG        |
| mBECN1_R       | CCATAGGGAACAAGTCGGTAC      |
| mCebpa-F       | CAAGAACAGCAACGAGTACCG      |
| mCebpa-R       | GTCACTGGTCAACTCCAGCAC      |
| PPARg2_F       | GATGCACTGCCTATGAGCACTT     |
| PPARg2_R       | AGAGGTCCACAGAGCTGATTC      |
| mFabp4-F       | AAGGTGAAGAGCATCATAACCCT    |
| mFabp4-R       | TCACGCCTTTCATAACACATTCC    |
| mFasn-F        | GGAGGTGGTGATAGCCGGTAT      |
| mFasn-R        | TGGGTAATCCATAGAGCCCAG      |
| mGlut4-F       | GTGACTGGAACACTGGTCCTA      |
| mGlut4-R       | CCAGCCACGTTGCATTGTAG       |
| mCd36-F        | GCAAAGGCATTGGCTGGAAG       |
| mCd36-R        | TTGGCCAAGCTATTGCGACA       |
| mAdiponectin_F | GCACTGGCAAGTTCTACTGCAA     |
| mAdiponectin_R | GTAGGTGAAGAGAACGGCCTTGT    |
| mLeptin-F      | CTGCAAGGTGCAAGAAGAAG       |
| mLeptin-R      | CCTGGTGACAATGGTCTTGA       |
| mF4/80-F       | TGCATCTAGCAATGGACAGC       |
| mF4/80-R       | GCCTTCTGGATCCATTTGAA       |
| mCd11b-F       | CCATGACCTTCCAAGAGAATGC     |
| mCd11b-R       | ACCGGCTTGTGCTGTAGTC        |
| mCd11c-F       | CAGTCTGGCAGATGTGGCTA       |
| mCd11c-R       | CACTCAGTGA CTGCCAAAA       |
| mTnfa-F        | AGGGTCTGGGCCATAGA ACT      |
| mTnfa-R        | GA ACTGGCAGAAGAGGCACT      |
| mI16-F         | AGTTGCCTTCTTGGGACTGA       |
| mI16-R         | TCCACGATTTCCAGAGAAC        |
| mMcp1_F        | TTAAAAACCTGGATCGGAACCAA    |
| mMcp1_R        | GCATTAGCTTCAGATTTACGGGT    |
| mCD206-F       | CTCTGTT CAGCTATTGGACGC     |
| mCD206_R       | CGGAATTTCTGGGATTCAGCTTC    |
| mI1-10_F       | GCTCTTACTGACTGGCATGAG      |
| mI1-10_R       | CGCAGCTCTAGGAGCATGTG       |
| mArg1_F        | CTCCAAGCCAAAGTCCTTAGAG     |
| mArg1_R        | AGGAGCTGTCATTAGGGACATC     |
| mPparg-F       | GTGCCAGTTTTCGATCCGTAGA     |
| mPparg-R       | GGCCAGCATCGTGTAGATGA       |
| mSrebp1c-F     | CTGTCTCACCC CAGCATAG       |
| mSrebp1c-R     | GGGCCTGACAGGTGAAATC        |
| mBax-F         | TGAAGACAGGGGCCTTTTTG       |
| mBax-R         | AATTCGCCGGAGACTCG          |
| mPUMA-F        | TCCTCAGCCCTCCCTGTCAC       |
| mPUMA-R        | CCATTTCTGGGGCTCCAGGA       |
| mNOXA-F        | GAACGCGCCAGTGAACCCAA       |

|                   |                          |
|-------------------|--------------------------|
| mNOXA-R           | CTTTGTCTCCAATCCTCCGG     |
| mBim-F            | CCCGGAGATACGGATTGCAC     |
| mBim-R            | GCCTCGCGGTAATCATTTGC     |
| mBcl2-F           | ATGCCTTTGTGGAACATATATGGC |
| mBcl2-R           | GGTATGCACCCAGAGTGATGC    |
| mAPAF1-F          | ATTGACTTGCTCCGAGTGCT     |
| mAPAF1-R          | GTTCAAAGCCGAGACAGGAG     |
| mPlin1-F          | CTGTGTGCAATGCCTATGAGA    |
| mPlin1-R          | CTGGAGGGTATTGAAGAGCCG    |
| mBax-F            | TGAAGACAGGGGCCTTTTTG     |
| mBax-R            | AATTCGCCGGAGACACTCG      |
| mBip-F            | ACTTGGGGACCACCTATTCCT    |
| mBip-R            | ATCGCCAATCAGACGCTCC      |
| mChop-F           | AAGCCTGGTATGAGGATCTGC    |
| mChop-R           | TTCCTGGGGATGAGATATAGGTG  |
| mAtf3-F           | GAGGATTTTGCTAACCTGACACC  |
| mATF3-R           | TTGACGGTAACTGACTCCAGC    |
| mDR5-F            | CGGGCAGATCACTACACCC      |
| mDR5-R            | TGTTACTGGAACAAAGACAGCC   |
| mTRIB3-F          | TGCAGGAAGAAACCGTTGGAG    |
| mTRIB3-R          | CTCGTTTTAGGACTGGACACTTG  |
| mGRADD34-F        | GAGGGACGCCCAACTTC        |
| mGRADD34-R        | TTACCAGAGACAGGGGTAGGT    |
| mEro1 $\alpha$ -F | TTCTGCCAGGTTAGTGGTTACC   |
| mEro1 $\alpha$ -R | GTTTGACGGCACAGTCTCTTC    |
